# Supplementary material
Source: PubMed Central journal article supplement (PMC4420921)

**Supplemental Table 1.**

Expression level of genes involved in response to oxidative stress in response to GAA and/or H<sub>2</sub>O<sub>2</sub> treatment.

**Supplemental Table 2.**

Primers used for qRT-PCR.

## Supplemental Figure legend

## Luciferase reporter assay

ARPE-19 cells were transfected with the pCMV  $\beta$ -galactoside reporter plasmid (0.1  $\mu$ g) and a luciferase reporter plasmid (0.1  $\mu$ g) using Lipofectamine LTX (Life Technologies) transfection reagent. At 24 h post - transfection, cells were treated with GAA for 24 hours, and then with/without H<sub>2</sub>O<sub>2</sub> for 30 minutes, before harvest for luciferase assays using Luciferase Assay System (Promega). Luciferase activity was normalized by  $\beta$ -galactosidase activity in the same assay.

## Supplemental Fig. 1

Ability of GAA to directly scavenge ROS. GAA (5 $\mu$ M) was added to the medium at the time of inducing oxidative stress with 300 $\mu$ M H<sub>2</sub>O<sub>2</sub>. Cell survival was measured 24h later with MTT.

## Supplemental Fig. 2

p21-luciferase assay in RPE cells upon H<sub>2</sub>O<sub>2</sub> and/or GAA treatment.

## Supplemental Fig. 3

Expression of FoxO1, FoxO3 and FoxO4 gene expression in RPE cells after normalized to level of Cyclophilin A gene.

Supplemental Fig. 4

(A) FoxO1 downregulation analyzed by measuring mRNA level with qRT-PCR. (B) FoxO1 downregulation measured by Western Blot using 25 $\mu$ g of total protein extract. (C) *FoxO1* knockdown did not affect *SESN2* upregulation by pretreatment with 5 $\mu$ M GAA measured by qRT-PCR. (D) *FoxO1* knockdown reduced RPE cell viability at the baseline and abolished the ability of 5 $\mu$ M GAA to protect RPE cells from H<sub>2</sub>O<sub>2</sub>-induced necrosis. (E) FoxO4 knockdown measured by mRNA level with qRT-PCR. (F) *FoxO4* downregulation reduced *SESN2* upregulation induced by pretreatment with 5 $\mu$ M GAA measured by qRT-PCR. (G) *FoxO4* downregulation reduced RPE cell viability at the base line and decreased the ability of 5 $\mu$ M GAA pretreatment to protect RPE cells from 300 $\mu$ M H<sub>2</sub>O<sub>2</sub>-induced necrosis.

**Supplemental Table 1**

|        | control    |      | 5μM GAA    |                | 300μM H <sub>2</sub> O <sub>2</sub> |                | 5μM GAA 300μM H <sub>2</sub> O <sub>2</sub> |                |
|--------|------------|------|------------|----------------|-------------------------------------|----------------|---------------------------------------------|----------------|
|        | Expression | SEM  | Expression | Expression SEM | Expression                          | Expression SEM | Expression                                  | Expression SEM |
| ALOX   | 1.00       | 0.31 | 1.56       | 0.27           | 0.24                                | 0.30           | 2.19                                        | 0.43           |
| CAT    | 1.00       | 0.09 | 0.98       | 0.13           | 1.00                                | 0.11           | 1.23                                        | 0.19           |
| GCLC   | 1.00       | 0.15 | 0.67       | 0.11           | 0.67                                | 0.08           | 0.67                                        | 0.09           |
| GPX1   | 1.00       | 0.08 | 1.18       | 0.23           | 1.09                                | 0.20           | 1.50                                        | 0.29           |
| GPX3   | 1.00       | 0.11 | 1.16       | 0.21           | 1.41                                | 0.20           | 1.72                                        | 0.35           |
| GSTA2  | 1.00       | 0.41 | 0.00       | 0.00           | 0.96                                | 0.21           | 0.53                                        | 0.12           |
| HMOX-1 | 1.00       | 0.10 | 1.88       | 0.25           | 1.28                                | 0.17           | 1.84                                        | 0.31           |
| NQO-1  | 1.00       | 0.09 | 0.93       | 0.12           | 1.26                                | 0.15           | 1.10                                        | 0.17           |
| SESN2  | 1.00       | 0.19 | 1.77       | 0.46           | 1.34                                | 0.20           | 4.07                                        | 0.90           |

Supplemental Table 2

| GeneID | Description                                  | Forward Primer        | Revers Primer        |
|--------|----------------------------------------------|-----------------------|----------------------|
| ALOX5  | Arachidonate 5-lipoxygenase                  | CCTCCCCT TTTCTTGCCTAC | ACCTCAGCCATCAAGTGTC  |
| CAT    | Catalase                                     | CGTGCTGAATGAGGAACAGA  | AGTCAGGGTGGACCTCAGTG |
| FOXO1  | Forkhead box O1                              | TGGAGTACATTTGCGCCTCG  | AGTAGAGGCCATCTTTGCGG |
| FOXO3  | Forkhead box O3                              | TGTGTCTGCCAGAATTCCC   | CTGGTGGTGGAGCAAGTTCT |
| FOXO4  | Forkhead box O4                              | CCCACCCTCAATGAAGGTCT  | TGCTGTAGGTGTGTAAGGGG |
| FTH    | Ferritin, heavy polypeptide 1                | ATGAGCAGGTGAAAGCCATC  | CAGGGTGTGCTTGTCAAAGA |
| FTL    | Ferritin, light polypeptide                  | AGGCCCTTTTGGATCTTCAT  | CAGGTGGTCACCCATCTTCT |
| GCLC   | Glutamate-cysteine ligase, catalytic subunit | GTGGATGTGGACACCAGATG  | GCGATAAACTCCCTCATCCA |
| GPX1   | Glutathione peroxidase 1                     | CCAAGCTCATCACCTGGTCT  | TCGATGTCAATGGTCTGGAA |
| GPX3   | Glutathione peroxidase 3                     | ATGCTGGCAAATACGTCCTC  | AGAATGACCAGACCGAATGG |
| GSTA2  | Glutathione S-transferase alpha 2            | CTCCAATATACGGGGCAGAA  | GCACTTGCTGGAACATCAAA |
| HMOX-1 | Heme oxygenase 1                             | AACTTTCAGAAGGGCCAGGT  | GTAGACAGGGGCGAAGACTG |
| NQO1   | NAD(P)H dehydrogenase, quinone 1             | GCACTGATCGTACTGGCTCA  | CATGGCATAGAGGTCCGACT |
| NRF2   | Nf-E2 related factor 2                       | CCTGGGAACAGAACAGGAAA  | TTCTGTGCAACCAGTTCAGG |
| SESN1  | Sestrin 1                                    | ATTCGGCTGTGGAATCAGTC  | TCCACACTGTGATTGCCATT |
| SESN2  | Sestrin 2                                    | GCTCTCCTCCTTCGTGTTTG  | GGGCTGCTCTGTTCACTAGG |
| SESN3  | Sestrin 3                                    | ATGCTTTGGCAAGCTTTGTT  | GCAAGATCACAAACGCAGAA |

Supplemental Fig. 1

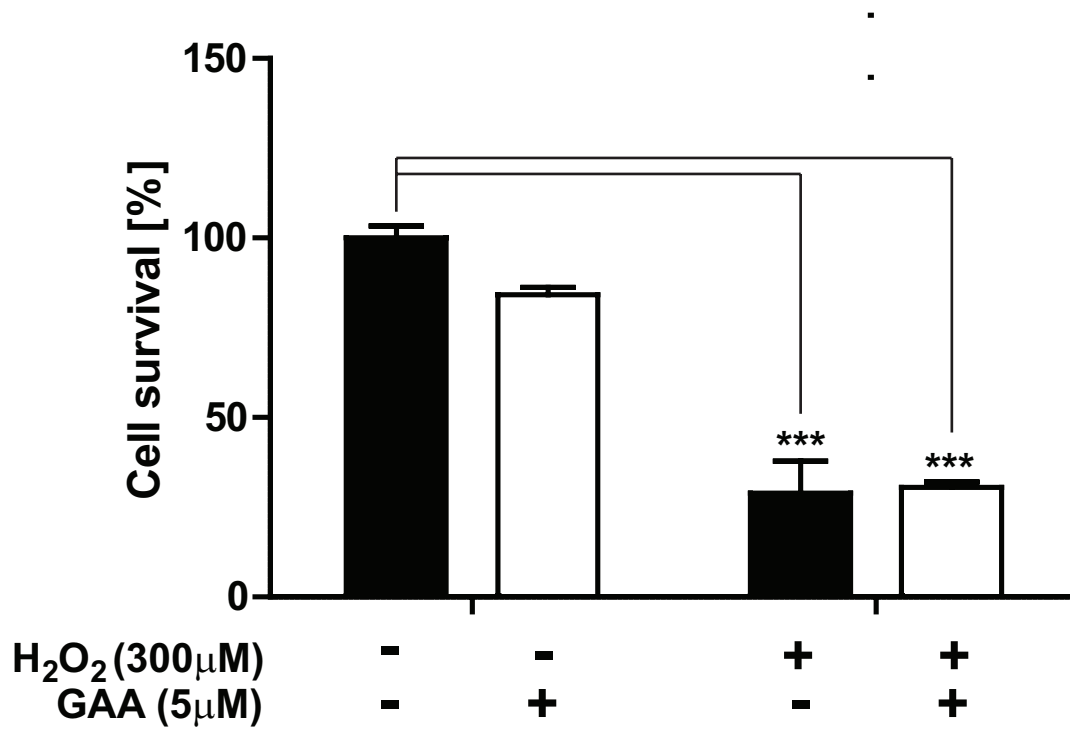

Supplemental Fig. 2

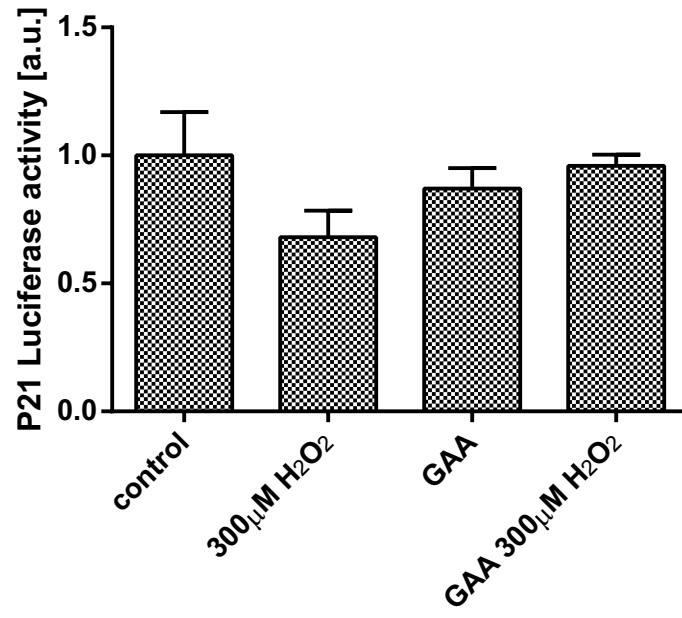

Supplemental Fig. 3

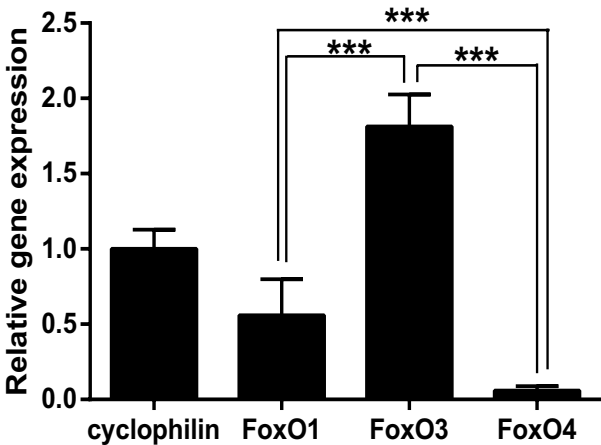

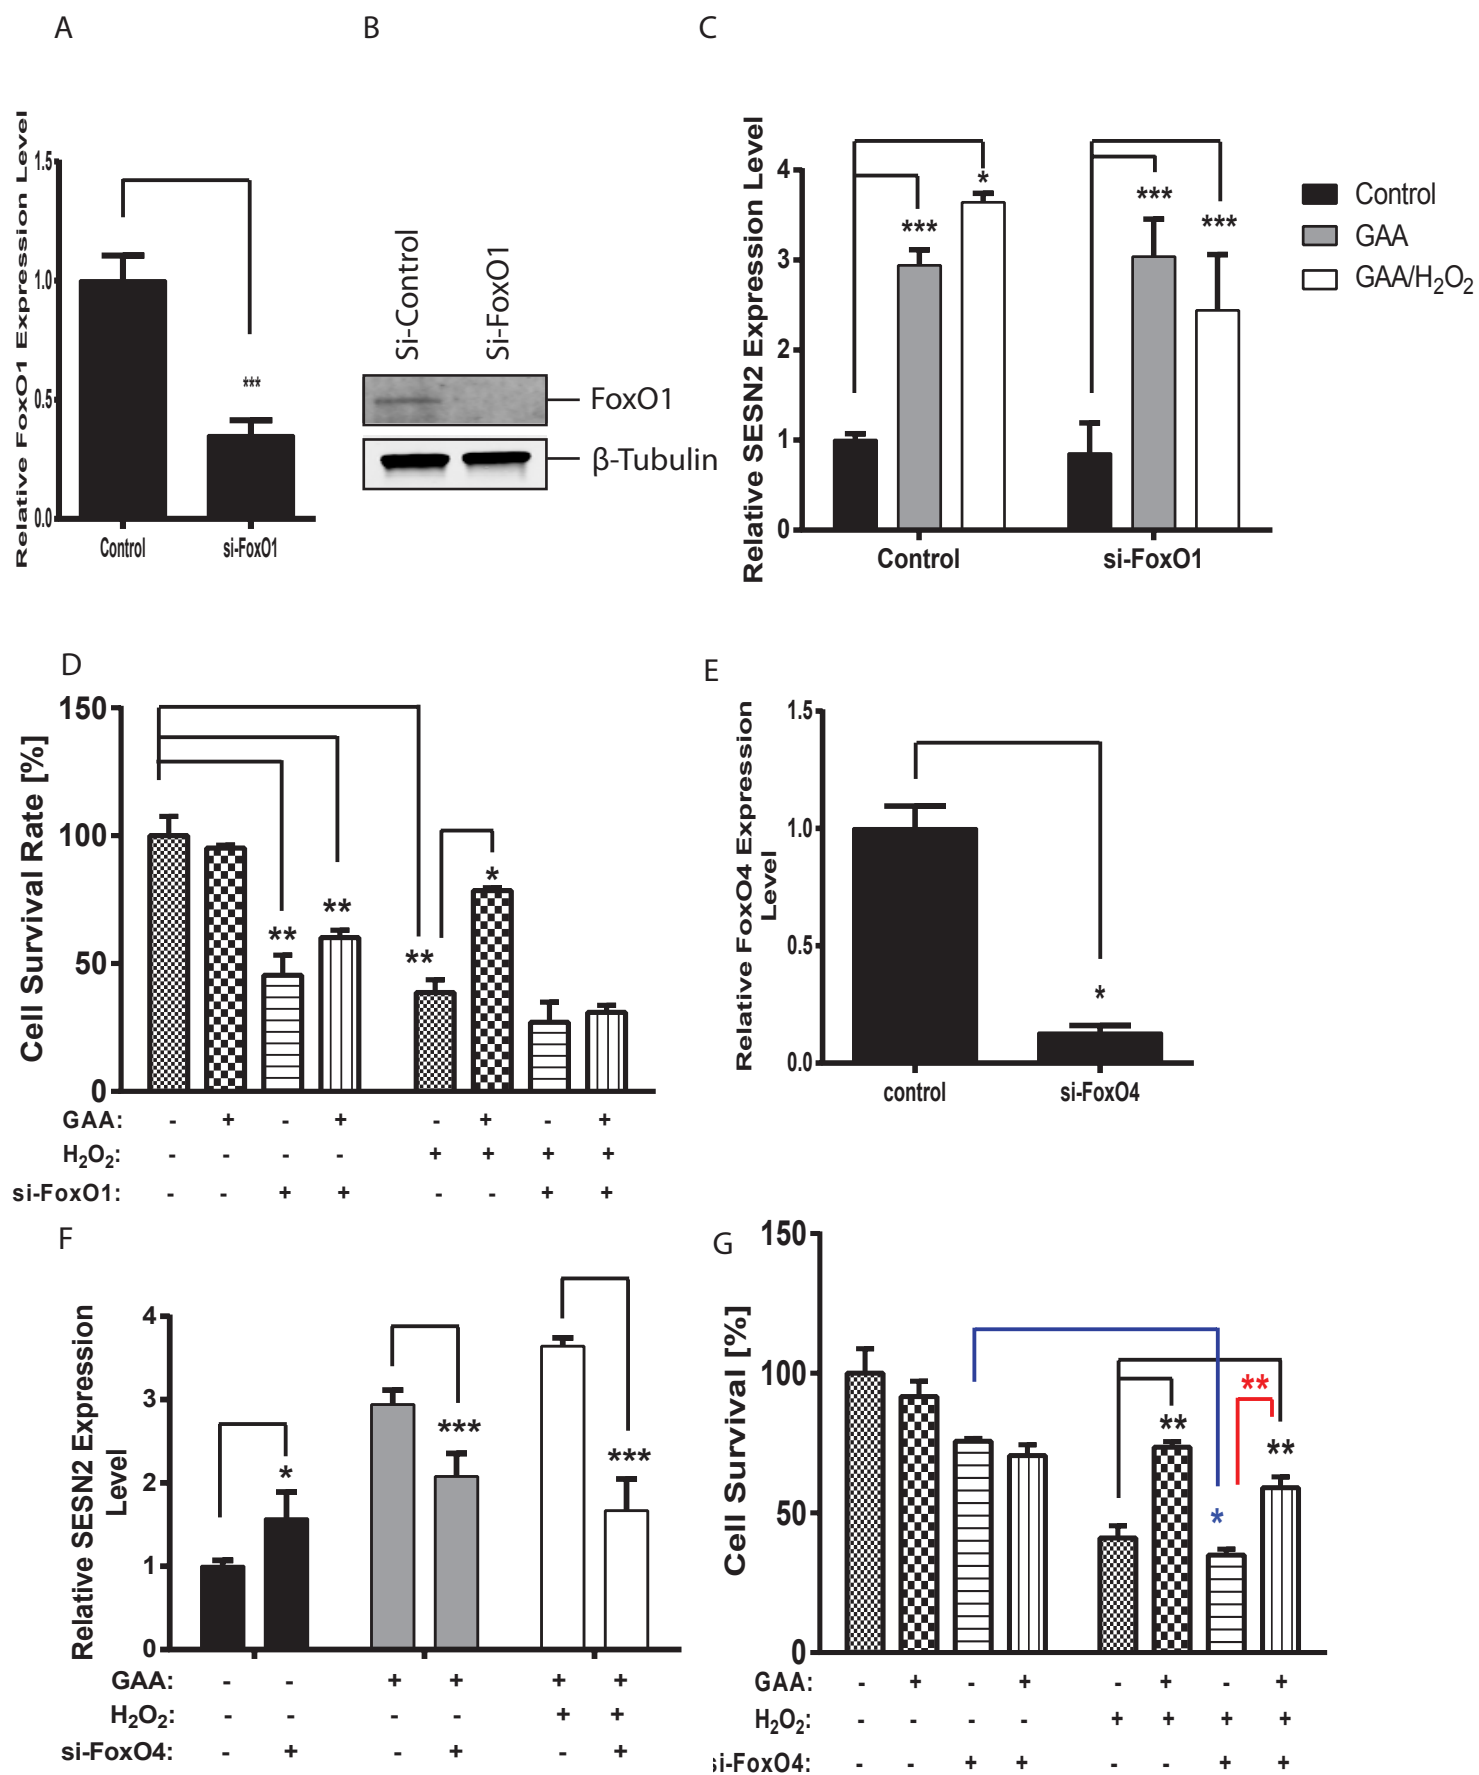

Supplement: MCB.00178-15_zmb999100841so1.pdf [file MCB.00178-15_zmb999100841so1.pdf]
